# Supplementary material for: Sex-Specific Expression of Histone Lysine Demethylases (KDMs) in Thyroid Cancer
Source: MDPI journal article supplement (doi:10.3390/cancers16071260), 2024-03-23
Supplement: s1 [file s1]

**Supplemental Table S1**

| #  | Symbol   | Gene name                                                                 | Upregulated in male (M) or female (F) | Linked with X/Y chromosomes |
|----|----------|---------------------------------------------------------------------------|---------------------------------------|-----------------------------|
| 1  | ABHD10   | abhydrolase domain containing 10                                          | M                                     | NO                          |
| 2  | ACRBP    | acrosin binding protein                                                   | M                                     | NO                          |
| 3  | ACTR3C   | ARP3 actin related protein 3 homolog C                                    | M                                     | NO                          |
| 4  | AGPAT3   | 1-acylglycerol-3-phosphate O-acyltransferase 3                            | M                                     | NO                          |
| 5  | AMELY    | amelogenin, Y-linked                                                      | M                                     | YES                         |
| 6  | APITD1   | centromere protein S                                                      | M                                     | NO                          |
| 7  | BCORL2   | Also known as BCORP1 BCL6 corepressor pseudogene 1                        | M                                     | YES                         |
| 8  | C17orf97 | chromosome 17 open reading frame 97                                       | M                                     | NO                          |
| 9  | CRISP2   | cysteine rich secretory protein 2                                         | M                                     | NO                          |
| 10 | CWH43    | cell wall biogenesis 43 C-terminal homolog                                | M                                     | NO                          |
| 11 | CYorf15A | TXLNGY taxilin gamma pseudogene, Y-linked                                 | M                                     | YES                         |
| 12 | CYorf15B | TXLNGY taxilin gamma pseudogene, Y-linked                                 | M                                     | NO                          |
| 13 | DDX3Y    | DEAD-box helicase 3, Y-linked                                             | M                                     | YES                         |
| 14 | EIF1AY   | eukaryotic translation initiation factor 1A, Y-linked                     | M                                     | YES                         |
| 15 | EPHB2    | EPH receptor B2                                                           | M                                     | NO                          |
| 16 | FAM125B  | MVB12B multivesicular body subunit 12B                                    | M                                     | NO                          |
| 17 | HSFY2    | heat shock transcription factor, Y-linked 2                               | M                                     | YES                         |
| 18 | KDM5D    | lysine demethylase 5D                                                     | M                                     | YES                         |
| 19 | MAPK9    | mitogen-activated protein kinase 9                                        | M                                     | NO                          |
| 20 | NCRNA001 | TTTY14 testis-specific transcript, Y-linked 14 (non-protein coding)       | M                                     | YES                         |
| 21 | NCRNA002 | FAM224B family with sequence similarity 224 member B (non-protein coding) | M                                     | YES                         |
| 22 | NLGN4Y   | neuroligin 4, Y-linked                                                    | M                                     | YES                         |
| 23 | PATZ1    | POZ/BTB and AT hook containing zinc finger 1                              | M                                     | NO                          |
| 24 | PCDH11Y  | protocadherin 11 Y-linked                                                 | M                                     | YES                         |
| 25 | PRKY     | protein kinase, Y-linked, pseudogene                                      | M                                     | YES                         |
| 26 | PTCD2    | pentatricopeptide repeat domain 2                                         | M                                     | NO                          |
| 27 | RBM46    | RNA binding motif protein 46                                              | M                                     | NO                          |
| 28 | RPS4Y1   | ribosomal protein S4, Y-linked 1                                          | M                                     | YES                         |
| 29 | RPS4Y2   | ribosomal protein S4, Y-linked 2                                          | M                                     | YES                         |
| 30 | SEPHS1   | selenophosphate synthetase 1                                              | M                                     | NO                          |
| 31 | ST6GAL2  | ST6 beta-galactoside alpha-2,6-sialyltransferase 2                        | M                                     | NO                          |
| 32 | TBL1Y    | transducin beta like 1 Y-linked                                           | M                                     | YES                         |
| 33 | TMSB4Y   | thymosin beta 4                                                           | M                                     | YES                         |
| 34 | TRAM1L1  | translocation associated membrane protein 1-like 1                        | M                                     | NO                          |
| 35 | TTTY10   | testis-specific transcript, Y-linked 10                                   | M                                     | YES                         |
| 36 | TTTY14   | testis-specific transcript, Y-linked 14                                   | M                                     | YES                         |
| 37 | TTTY15   | testis-specific transcript, Y-linked 15                                   | M                                     | YES                         |
| 38 | TXNDC15  | thioredoxin domain containing 15                                          | M                                     | NO                          |
| 39 | USP9Y    | ubiquitin specific peptidase 9, Y-linked                                  | M                                     | YES                         |
| 40 | UTY      | ubiquitously transcribed tetratricopeptide repeat containing, Y-linked    | M                                     | YES                         |
| 41 | ZBED1    | zinc finger BED-type containing 1                                         | M                                     | YES                         |
| 42 | ZFY      | zinc finger protein, Y-linked                                             | M                                     | YES                         |
| 43 | ZNF396   | zinc finger protein 396                                                   | M                                     | NO                          |
| 44 | ZNF709   | zinc finger protein 709                                                   | M                                     | NO                          |
| 45 | CA5BP    | carbonic anhydrase 5B pseudogene 1                                        | F                                     | YES                         |
| 46 | DDX3X    | DEAD-box helicase 3, X-linked                                             | F                                     | YES                         |
| 47 | EIF1AX   | eukaryotic translation initiation factor 1A, X-linked                     | F                                     | YES                         |
| 48 | EIF2S3   | eukaryotic translation initiation factor 2 subunit gamma                  | F                                     | YES                         |
| 49 | HDHD1A   | pseudouridine 5'-phosphatase                                              | F                                     | YES                         |
| 50 | IL12A    | interleukin 12A                                                           | F                                     | NO                          |
| 51 | INPP1    | inositol polyphosphate-1-phosphatase                                      | F                                     | NO                          |
| 52 | ITGA5    | integrin subunit alpha 5                                                  | F                                     | NO                          |
| 53 | KDM5C    | lysine demethylase 5C                                                     | F                                     | YES                         |
| 54 | KDM6A    | lysine demethylase 6A                                                     | F                                     | YES                         |
| 55 | LCN6     | lipocalin 6                                                               | F                                     | NO                          |

|    |          |                                                                     |   |     |
|----|----------|---------------------------------------------------------------------|---|-----|
| 56 | MYO1A    | myosin IA                                                           | F | NO  |
| 57 | NCRNA00  | JPX transcript, XIST activator (non-protein coding)                 | F | YES |
| 58 | OFD1     | centriole and centriolar satellite protein                          | F | YES |
| 59 | PIM1     | Pim-1 proto-oncogene, serine/threonine kinase                       | F | NO  |
| 60 | PIP5K1B  | phosphatidylinositol-4-phosphate 5-kinase type 1 beta               | F | NO  |
| 61 | PNPLA4   | patatin like phospholipase domain containing 4                      | F | YES |
| 62 | PPP1R2P9 | protein phosphatase 1 regulatory inhibitor subunit 2 pseudogene 9   | F | YES |
| 63 | RAET1L   | retinoic acid early transcript 1L                                   | F | NO  |
| 64 | RPS4X    | ribosomal protein S4, X-linked                                      | F | YES |
| 65 | SPAG6    | sperm associated antigen 6p                                         | F | NO  |
| 66 | SYAP1    | synapse associated protein 1                                        | F | YES |
| 67 | TAGLN2   | transgelin 2                                                        | F | NO  |
| 68 | TSIX     | TSIX transcript, XIST antisense RNAp                                | F | YES |
| 69 | VAX2     | ventral anterior homeobox 2                                         | F | NO  |
| 70 | XIST     | X inactive specific transcript                                      | F | YES |
| 71 | ZRSR2    | zinc finger CCCH-type, RNA binding motif and serine/arginine rich 2 | F | YES |
| 72 | ZYX      | zyxin                                                               | F | NO  |

---

## Supplemental Table S2

| Symbol | Entrez Gene Name                                                    | Location            | Family                  | Gene ID |
|--------|---------------------------------------------------------------------|---------------------|-------------------------|---------|
| COPG2  | COPI coat complex subunit gamma 2                                   | Cytoplasm           | transporter             | 26958   |
| INPP1  | inositol polyphosphate-1-phosphatase                                | Cytoplasm           | phosphatase             | 3628    |
| ITGA5  | integrin subunit alpha 5                                            | Plasma Membrane     | transmembrane receptor  | 3678    |
| LCN6   | lipocalin 6                                                         | Extracellular Space | other                   | 158062  |
| MYO1A  | myosin IA                                                           | Cytoplasm           | peptidase               | 4640    |
| PUDP   | pseudouridine 5'-phosphatase                                        | Cytoplasm           | enzyme                  | 8226    |
| RAET1L | retinoic acid early transcript 1L                                   | Plasma Membrane     | other                   | 154064  |
| RPS4X  | ribosomal protein S4 X-linked                                       | Cytoplasm           | other                   | 6191    |
| TAGLN2 | transgelin 2                                                        | Cytoplasm           | other                   | 8407    |
| VAX2   | ventral anterior homeobox 2                                         | Nucleus             | transcription regulator | 25806   |
| ZRSR2  | zinc finger CCCH-type, RNA binding motif and serine/arginine rich 2 | Nucleus             | other                   | 8233    |
| ZYX    | zyxin                                                               | Plasma Membrane     | other                   | 7791    |

### Supplemental Table S3

| Symbol  | Entrez Gene Name                                     | Location            | Family                  | Gene ID |
|---------|------------------------------------------------------|---------------------|-------------------------|---------|
| ABHD10  | abhydrolase domain containing 10, depalmitoylase     | Cytoplasm           | enzyme                  | 55347   |
| ACRBP   | acrosin binding protein                              | Extracellular Space | other                   | 84519   |
| ACTR3C  | actin related protein 3C                             | Cytoplasm           | other                   | 653857  |
| AGPAT3  | 1-acylglycerol-3-phosphate O-acyltransferase 3       | Cytoplasm           | enzyme                  | 56894   |
| AMELY   | amelogenin Y-linked                                  | Extracellular Space | growth factor           | 266     |
| CWH43   | cell wall biogenesis 43 C-terminal homolog           | Other               | other                   | 80157   |
| DDX3X   | DEAD-box helicase 3 X-linked                         | Cytoplasm           | enzyme                  | 1654    |
| EIF1AX  | eukaryotic translation initiation factor 1A X-linked | Cytoplasm           | translation regulator   | 1964    |
| EPHB2   | EPH receptor B2                                      | Plasma Membrane     | kinase                  | 2048    |
| IL12A   | interleukin 12A                                      | Extracellular Space | cytokine                | 3592    |
| KDM6A   | lysine demethylase 6A                                | Nucleus             | enzyme                  | 7403    |
| PCDH11Y | protocadherin 11 Y-linked                            | Other               | other                   | 83259   |
| PIM1    | Pim-1 proto-oncogene, serine/threonine kinase        | Cytoplasm           | kinase                  | 5292    |
| PNPLA4  | patatin like phospholipase domain containing 4       | Cytoplasm           | enzyme                  | 8228    |
| PPP1R2C | PPP1R2C family member C                              | Other               | other                   | 80316   |
| PRKY    | protein kinase Y-linked (pseudogene)                 | Other               | other                   | 5616    |
| PTCD2   | pentatricopeptide repeat domain 2                    | Cytoplasm           | other                   | 79810   |
| RBM46   | RNA binding motif protein 46                         | Nucleus             | other                   | 166863  |
| SEPHS1  | selenophosphate synthetase 1                         | Other               | enzyme                  | 22929   |
| SEPHS1P | selenophosphate synthetase 1 pseudogene 1            | Other               | other                   | 168474  |
| SYAP1   | synapse associated protein 1                         | Nucleus             | other                   | 94056   |
| TRAM1L1 | translocation associated membrane protein 1 like 1   | Extracellular Space | other                   | 133022  |
| TXNDC15 | thioredoxin domain containing 15                     | Extracellular Space | enzyme                  | 79770   |
| ZNF396  | zinc finger protein 396                              | Nucleus             | transcription regulator | 252884  |
| ZNF709  | zinc finger protein 709                              | Other               | other                   | 163051  |
